# Supplementary material for: The Pet127 protein is a mitochondrial 5′-to-3′ exoribonuclease from the PD-(D/E)XK superfamily involved in RNA maturation and intron degradation in yeasts
Source: RNA. 2022 May;28(5):711–28. doi: 10.1261/rna.079083.121 (PMC9014873; doi:10.1261/rna.079083.121)
Supplement: Supplemental Material [file supp_079083.121_Supplemental_Table_S1.xlsx]

## Sheet: Sheet1
Supplemental Table S1: List of Pet127 orthologs identified in Eukaryotic taxa.
Accession#	Species	Supergroup	Clade1	Clade2
XP_012753948.1	Acytostelium subglobosum LB1	Amorphea	Amoebozoa	Dictyostelia
XP_004361794.1	Cavenderia fasciculata	Amorphea	Amoebozoa	Dictyostelia
XP_640352.1	Dictyostelium discoideum AX4	Amorphea	Amoebozoa	Dictyostelia
XP_003292100.1	Dictyostelium purpureum	Amorphea	Amoebozoa	Dictyostelia
XP_020437496.1	Heterostelium album PN500	Amorphea	Amoebozoa	Dictyostelia
KAF2076972.1	Polysphondylium violaceum	Amorphea	Amoebozoa	Dictyostelia
KYR01970.1	Tieghemostelium lacteum	Amorphea	Amoebozoa	Dictyostelia
PRP73467.1	Planoprotostelium fungivorum	Amorphea	Amoebozoa	Protostelia
XP_013761140.1	Thecamonas trahens ATCC 50062	Amorphea	Apusomonadida
ORX88960.1	Basidiobolus meristosporus CBS 931.73	Amorphea	Fungi	Basidiobolomyceta
KNE67998.1	Allomyces macrogynus ATCC 38327	Amorphea	Fungi	Blastocladiomyceta
KNE67084.1	Allomyces macrogynus ATCC 38327	Amorphea	Fungi	Blastocladiomyceta
ORZ31652.1	Catenaria anguillulae PL171	Amorphea	Fungi	Blastocladiomyceta
XP_006675345.1	Batrachochytrium dendrobatidis JAM81	Amorphea	Fungi	Chytridiomyceta
OAJ36406.1	Batrachochytrium dendrobatidis JEL423	Amorphea	Fungi	Chytridiomyceta
OON05275.1	Batrachochytrium salamandrivorans	Amorphea	Fungi	Chytridiomyceta
KAH6561037.1	Batrachochytrium salamandrivorans	Amorphea	Fungi	Chytridiomyceta
KAH6579659.1	Batrachochytrium salamandrivorans	Amorphea	Fungi	Chytridiomyceta
RKO85080.1	Blyttiomyces helicus	Amorphea	Fungi	Chytridiomyceta
RKP00120.1	Caulochytrium protostelioides	Amorphea	Fungi	Chytridiomyceta
TPX77821.1	Chytriomyces confervae	Amorphea	Fungi	Chytridiomyceta
KXS20889.1	Gonapodya prolifera JEL478	Amorphea	Fungi	Chytridiomyceta
TPX61683.1	Powellomyces hirtus	Amorphea	Fungi	Chytridiomyceta
ORY29919.1	Rhizoclosmatium globosum	Amorphea	Fungi	Chytridiomyceta
XP_016610809.1	Spizellomyces punctatus DAOM BR117	Amorphea	Fungi	Chytridiomyceta
TPX69393.1	Spizellomyces sp. 'palustris'	Amorphea	Fungi	Chytridiomyceta
CBF70945.1	Aspergillus nidulans FGSC A4	Amorphea	Fungi	Dikarya/Ascomycota*
XP_713914.2	Candida albicans SC5314	Amorphea	Fungi	Dikarya/Ascomycota*
QEU60927.1	Kluyveromyces lactis	Amorphea	Fungi	Dikarya/Ascomycota*
XP_961390.2	Neurospora crassa OR74A	Amorphea	Fungi	Dikarya/Ascomycota*
CDM37532.1	Penicillium roqueforti FM164	Amorphea	Fungi	Dikarya/Ascomycota*
KGK36702.1	Pichia kudriavzevii	Amorphea	Fungi	Dikarya/Ascomycota*
NP_014660.1	Saccharomyces cerevisiae S288C	Amorphea	Fungi	Dikarya/Ascomycota*
NP_587887.1	Schizosaccharomyces pombe	Amorphea	Fungi	Dikarya/Ascomycota*
XP_002153343.1	Talaromyces marneffei ATCC 18224	Amorphea	Fungi	Dikarya/Ascomycota*
QNP96736.1	Yarrowia lipolytica	Amorphea	Fungi	Dikarya/Ascomycota*
XP_007329720.1	Agaricus bisporus var. burnettii JB137-S8	Amorphea	Fungi	Dikarya/Basidiomycota*
KAF8133195.1	Boletus edulis	Amorphea	Fungi	Dikarya/Basidiomycota*
KAG9308495.1	Chiua virens	Amorphea	Fungi	Dikarya/Basidiomycota*
KAF5338905.1	Coprinellus angulatus	Amorphea	Fungi	Dikarya/Basidiomycota*
OXH22573.1	Cryptococcus neoformans var. grubii	Amorphea	Fungi	Dikarya/Basidiomycota*
KAF9267511.1	Marasmius fiardii PR-910	Amorphea	Fungi	Dikarya/Basidiomycota*
CUA75180.1	Rhizoctonia solani	Amorphea	Fungi	Dikarya/Basidiomycota*
OAX33868.1	Rhizopogon vinicolor AM-OR11-026	Amorphea	Fungi	Dikarya/Basidiomycota*
XP_041154802.1	Suillus plorans	Amorphea	Fungi	Dikarya/Basidiomycota*
XP_011388606.1	Ustilago maydis 521	Amorphea	Fungi	Dikarya/Basidiomycota*
KAF8934071.1	Dissophora ornata	Amorphea	Fungi	Mucoromyceta*
KAF8976363.1	Entomortierella lignicola	Amorphea	Fungi	Mucoromyceta*
KAF8947760.1	Haplosporangium gracile	Amorphea	Fungi	Mucoromyceta*
KAF9180610.1	Haplosporangium sp. Z 11	Amorphea	Fungi	Mucoromyceta*
KAG0266424.1	Linnemannia exigua	Amorphea	Fungi	Mucoromyceta*
KAG9321920.1	Mortierella alpina	Amorphea	Fungi	Mucoromyceta*
EPB82206.1	Mucor circinelloides 1006PhL	Amorphea	Fungi	Mucoromyceta*
XP_018289686.1	Phycomyces blakesleeanus NRRL 1555(-)	Amorphea	Fungi	Mucoromyceta*
KAF9427875.1	Podila epigama	Amorphea	Fungi	Mucoromyceta*
PJF19625.1	Paramicrosporidium saccamoebae	Amorphea	Fungi	Rozellomyceta
RKP19034.1	Rozella allomycis CSF55	Amorphea	Fungi	Rozellomyceta
ORX88960.1	Basidiobolus meristosporus CBS 931.73	Amorphea	Fungi	Zoopagomyceta
PIA14473.1	Coemansia reversa NRRL 1564	Amorphea	Fungi	Zoopagomyceta
KXN72887.1	Conidiobolus coronatus NRRL 28638	Amorphea	Fungi	Zoopagomyceta
RKP36148.1	Dimargaris cristalligena	Amorphea	Fungi	Zoopagomyceta
KAF7747132.1	Entomophthora muscae	Amorphea	Fungi	Zoopagomyceta
PVU96362.1	Furculomyces boomerangus	Amorphea	Fungi	Zoopagomyceta
XP_040746945.1	Linderina pennispora	Amorphea	Fungi	Zoopagomyceta
RKP15296.1	Piptocephalis cylindrospora	Amorphea	Fungi	Zoopagomyceta
OMJ11888.1	Smittium culicis	Amorphea	Fungi	Zoopagomyceta
OMJ28257.1	Smittium culicis	Amorphea	Fungi	Zoopagomyceta
OMJ20987.1	Smittium culicis	Amorphea	Fungi	Zoopagomyceta
OMJ12396.1	Smittium culicis	Amorphea	Fungi	Zoopagomyceta
OMJ21468.1	Smittium culicis	Amorphea	Fungi	Zoopagomyceta
PVV05373.1	Smittium megazygosporum	Amorphea	Fungi	Zoopagomyceta
OLY80157.1	Smittium mucronatum	Amorphea	Fungi	Zoopagomyceta
PVU90332.1	Smittium simulii	Amorphea	Fungi	Zoopagomyceta
RKP24498.1	Syncephalis pseudoplumigaleata	Amorphea	Fungi	Zoopagomyceta
RKP23627.1	Syncephalis pseudoplumigaleata	Amorphea	Fungi	Zoopagomyceta
XP_009496751.1	Fonticula alba	Amorphea	Nucleariae
XP_005719249.1	Chondrus crispus	Archaeplastida	Rhodophyta
KAF6001762.1	Cyanidiococcus yangmingshanensis	Archaeplastida	Rhodophyta
XP_005538509.1	Cyanidioschyzon merolae strain 10D	Archaeplastida	Rhodophyta
XP_005708923.1	Galdieria sulphuraria	Archaeplastida	Rhodophyta
PXF44787.1	Gracilariopsis chorda	Archaeplastida	Rhodophyta
KAA8493004.1	Porphyridium purpureum	Archaeplastida	Rhodophyta
XP_005842424.1	Guillardia theta CCMP2712	Cryptista	Cryptophyta
CAG4713603.1	Naegleria fowleri	Discoba	Heterolobosea
KAF0972023.1	Naegleria fowleri	Discoba	Heterolobosea
XP_002681093.1	Naegleria gruberi	Discoba	Heterolobosea
XP_044549207.1	Naegleria lovaniensis	Discoba	Heterolobosea
KAF0852766.1	Andalucia godoyi	Discoba	Jakobea
XP_004040013.1	Ichthyophthirius multifiliis	TSAR	Alveolata	Ciliophora
CAD8156647.1	Paramecium octaurelia	TSAR	Alveolata	Ciliophora
CAD8160904.1	Paramecium pentaurelia	TSAR	Alveolata	Ciliophora
CAD8062341.1	Paramecium primaurelia	TSAR	Alveolata	Ciliophora
CAD8073787.1	Paramecium sonneborni	TSAR	Alveolata	Ciliophora
CAD8078816.1	Paramecium sonneborni	TSAR	Alveolata	Ciliophora
XP_001439398.1	Paramecium tetraurelia strain d4-2	TSAR	Alveolata	Ciliophora
KRX00122.1	Pseudocohnilembus persalinus	TSAR	Alveolata	Ciliophora
OMJ92833.1	Stentor coeruleus	TSAR	Alveolata	Ciliophora
OMJ95936.1	Stentor coeruleus	TSAR	Alveolata	Ciliophora
CDW84422.1	Stylonychia lemnae	TSAR	Alveolata	Ciliophora
XP_001025700.1	Tetrahymena thermophila SB210	TSAR	Alveolata	Ciliophora
OLP80165.1	Symbiodinium microadriaticum	TSAR	Alveolata	Dinoflagellata
CAE7395994.1	Symbiodinium microadriaticum	TSAR	Alveolata	Dinoflagellata
CAE7526344.1	Symbiodinium natans	TSAR	Alveolata	Dinoflagellata
CAE7207899.1	Symbiodinium necroappetens	TSAR	Alveolata	Dinoflagellata
CAE7728740.1	Symbiodinium pilosum	TSAR	Alveolata	Dinoflagellata
CAE7199118.1	Symbiodinium sp. CCMP2456	TSAR	Alveolata	Dinoflagellata
CAE7430282.1	Symbiodinium sp. CCMP2592	TSAR	Alveolata	Dinoflagellata
CAE7348997.1	Symbiodinium sp. KB8	TSAR	Alveolata	Dinoflagellata
CEO98760.1	Plasmodiophora brassicae	TSAR	Rhizaria
* In Ascomycota, Basidiomycota, and Mycoromyceta there are >50 Pet127 orthologues per clade, of which only 10 examples were included in this table and in the phylogenetic analysis.
